# Supplementary material
Source: MDPI journal article supplement (https://www.mdpi.com/2218-0532/92/2/25)
Supplement: s1 [file s1]

# Supporting Information

## Breast Cancer Prevention by Dietary Polyphenols: Microemulsion Formulation and In Vitro Studies

Ghea Putri Cristy<sup>1</sup>, Desy Liana<sup>1</sup>, Jaruwan Chatwichien<sup>2,3</sup>, Chanat Aonbangkhen<sup>4</sup>, Chantragan Srisomsap<sup>5</sup>, and Anuchit Phanumartwiwath<sup>1,6\*</sup>

<sup>1</sup> College of Public Health Sciences, Chulalongkorn University, Bangkok 10330, Thailand.

<sup>2</sup> Program in Chemical Sciences, Chulabhorn Graduate Institute, Bangkok 10210, Thailand.

<sup>3</sup> Chulabhorn Royal Academy, Bangkok 10210, Thailand.

<sup>4</sup> Center of Excellence in Natural Products Chemistry, Department of Chemistry, Faculty of Science, Chulalongkorn University, Bangkok, 10330, Thailand.

<sup>5</sup> Chulabhorn Research Institute, Bangkok 10210, Thailand.

<sup>6</sup> Excellent Center for Health and Social Sciences and Addiction Research, Chulalongkorn University, Bangkok 10330, Thailand.

\*Correspondence: Dr. Anuchit Phanumartwiwath; College of Public Health Sciences, Chulalongkorn University, Bangkok 10330, Thailand.

E-mail: [anuchit.p@chula.ac.th](mailto:anuchit.p@chula.ac.th)

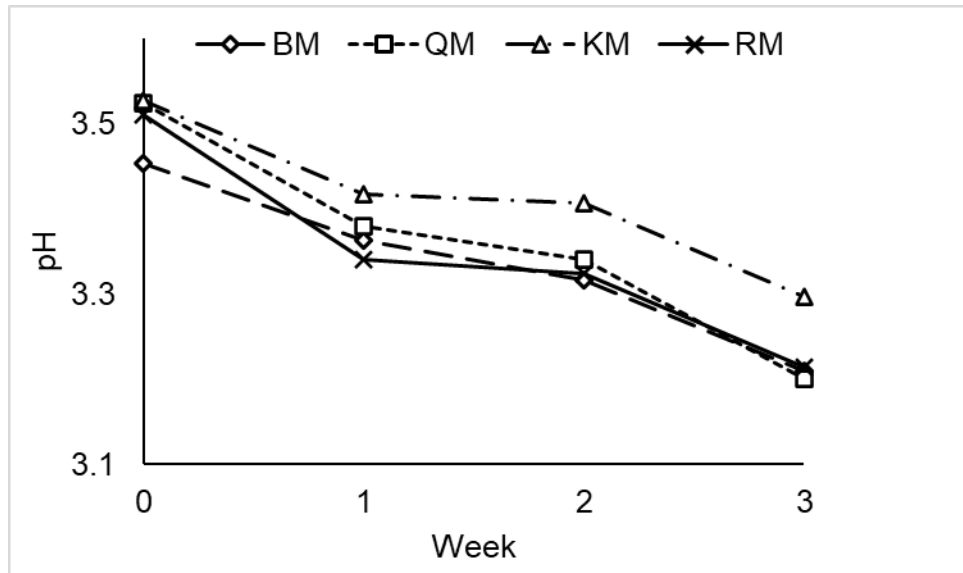

**Figure S1.** Gradual change of blank microemulsion (BM) and PL-ME formulations (QM, KM, and RM) at different pH values and times.

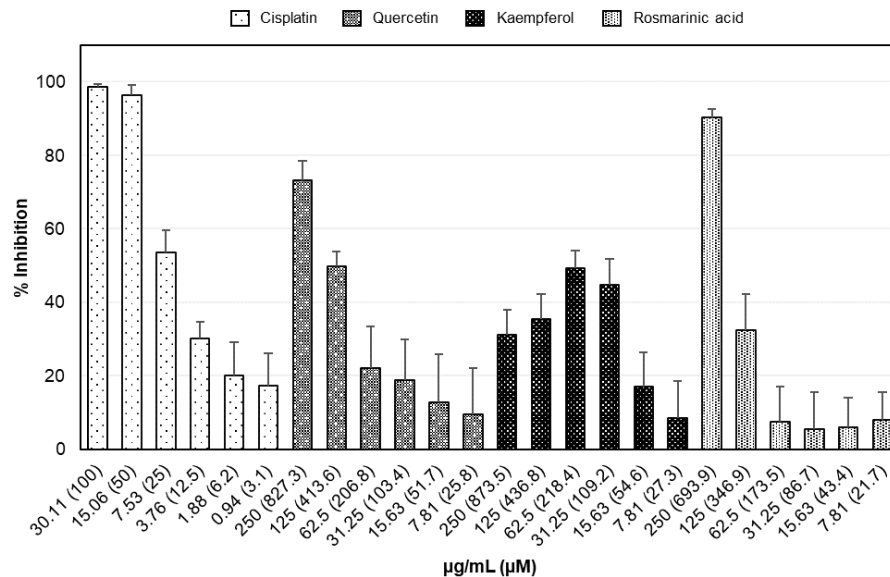

**Figure S2.** Dietary polyphenols exhibit safer inhibitory activity on normal dermal cells (HaCaT) proliferation than cisplatin. Kaempferol precipitation was observed at high concentrations (250 µg/mL and 125 µg/mL).

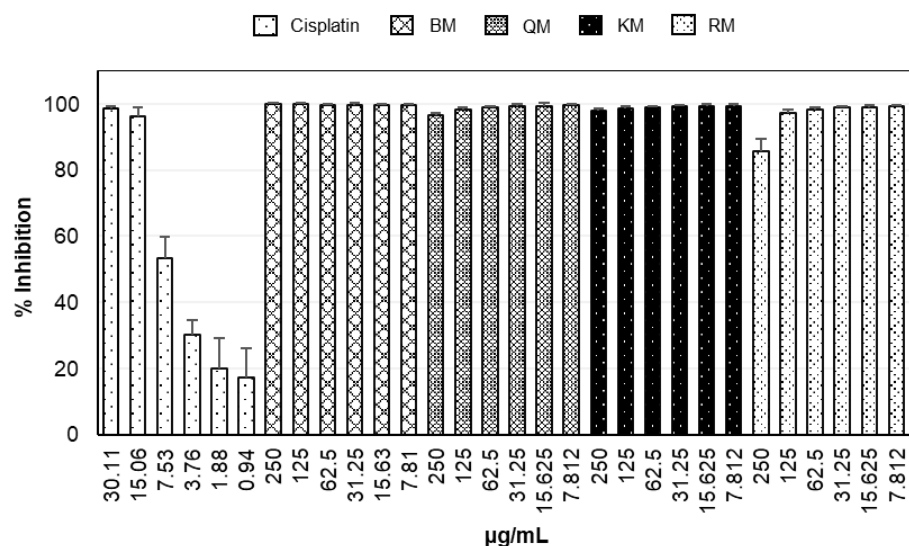

**Figure S3.** Inhibitory effect of PL-MEs on proliferation of normal dermal cells (HaCaT). Abbreviations: quercetin-loaded microemulsion (QM), kaempferol-loaded microemulsion (KM), rosmarinic acid-loaded microemulsion (RM).

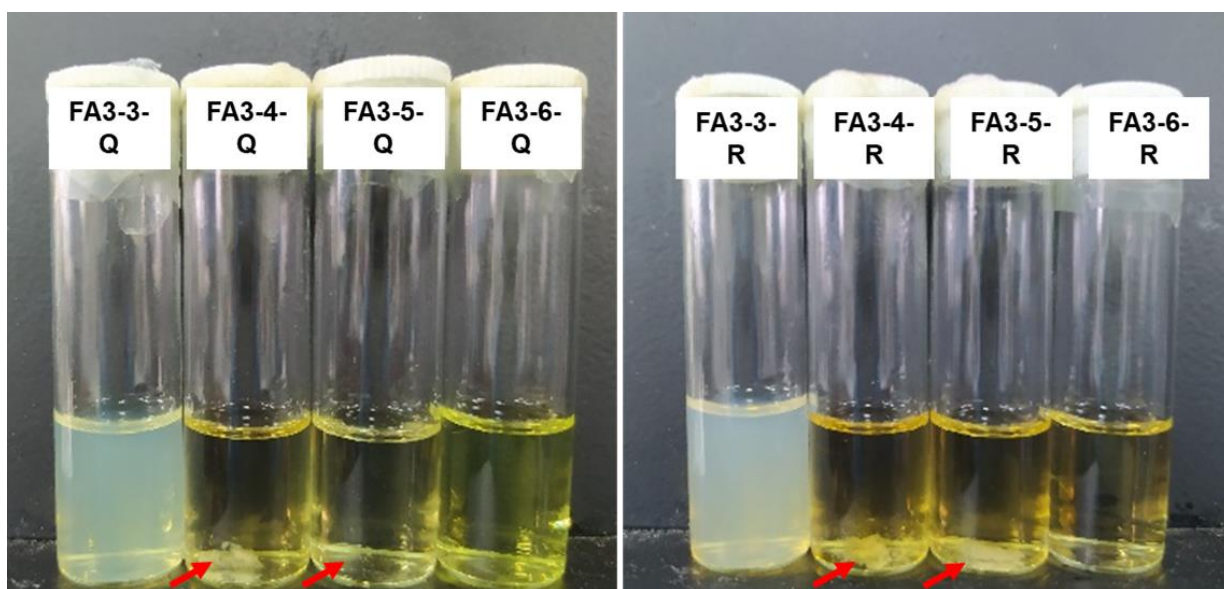

**Figure S4.** Appearance of quercetin (Q)- and rosmarinic acid (R)-loaded microemulsions based on experiment in Table S3. Red arrows pointed aggregation of the microemulsion formula. No physical destabilization was observed in formula **FA3-6-Q** and **FA3-6-R**; both formulations exhibited the highest percent of transmittance for quercetin and rosmarinic acid, respectively.

**Table S1.** First screening of components and optimization of microemulsion carrier without polyphenols.

| Experiment              | Code        | Organic phase |          |                |                | Aqueous phase<br>(% v/v) | Transmittance<br>(%)  |
|-------------------------|-------------|---------------|----------|----------------|----------------|--------------------------|-----------------------|
|                         |             | Carrier oil   | EtOH     | Polysorbate 20 | Polysorbate 80 |                          |                       |
|                         |             | (% v/v)       | (% v/v)  | (% w/v)        | (% w/v)        |                          |                       |
| Microemulsion carrier A | FO1         | 4             | 6        | 0              | 10             | 80                       | Turbid                |
|                         | FO2         | 2             | 8        | 0              | 10             | 80                       | Turbid                |
|                         | FO3         | 1             | 9        | 0              | 10             | 80                       | Turbid                |
|                         | FA1         | 4             | 6        | 0              | 10             | 80                       | Turbid                |
|                         | FA2         | 2             | 8        | 0              | 10             | 80                       | Turbid                |
|                         | <b>*FA3</b> | <b>1</b>      | <b>9</b> | <b>0</b>       | <b>10</b>      | <b>80</b>                | <b>99.384 ± 0.006</b> |
|                         | FM1         | 4             | 6        | 0              | 10             | 80                       | Turbid                |
|                         | FM2         | 2             | 8        | 0              | 10             | 80                       | Turbid                |
|                         | FM3         | 1             | 9        | 0              | 10             | 80                       | 97.258 ± 0.028        |

\*Selected formulation for further optimization based on its high transmittance that was closest to 100 %. Ultrapure water was used as aqueous phase. Abbreviation: formula with olive oil (FO), formula with oleic acid (FA), formula with medium chain triglyceride oil (FM).

**Table S2.** Second screening of components and further optimization of FA3 without polyphenols to reduce EtOH concentration.

| Experiment                     | Code          | Organic phase         |                 |                           |                           | Aqueous phase<br>(% v/v) | Transmittance<br>(%)  |
|--------------------------------|---------------|-----------------------|-----------------|---------------------------|---------------------------|--------------------------|-----------------------|
|                                |               | Oleic acid<br>(% v/v) | EtOH<br>(% v/v) | Polysorbate 20<br>(% w/v) | Polysorbate 80<br>(% w/v) |                          |                       |
| Microemulsion carrier <b>B</b> | FA3-1         | 1                     | 1               | 0                         | 10                        | 88                       | 34.857 ± 0.003        |
|                                | FA3-2         | 1                     | 3               | 0                         | 10                        | 86                       | 95.837 ± 0.003        |
|                                | <b>*FA3-3</b> | <b>1</b>              | <b>6</b>        | <b>0</b>                  | <b>10</b>                 | <b>83</b>                | <b>99.400 ± 0.009</b> |
|                                | <b>*FA3-4</b> | <b>1</b>              | <b>1</b>        | <b>10</b>                 | <b>0</b>                  | <b>88</b>                | <b>99.392 ± 0.019</b> |
|                                | <b>*FA3-5</b> | <b>1</b>              | <b>3</b>        | <b>10</b>                 | <b>0</b>                  | <b>86</b>                | <b>99.526 ± 0.005</b> |
|                                | <b>*FA3-6</b> | <b>1</b>              | <b>6</b>        | <b>10</b>                 | <b>0</b>                  | <b>83</b>                | <b>98.943 ± 0.010</b> |

\*Selected formulations to use in preliminary stability test to observe the compatibility of the microemulsion carriers with dietary polyphenols (Que and RA). Ultrapure water was used as aqueous phase.

**Table S3.** Incorporating dietary polyphenols (Que and RA) into selected microemulsion carrier candidates (microemulsion carrier B).

| Code                  | Polyphenol<br>(1.5 mg) | Organic phase            |                    |                              |                              | Aqueous<br>phase<br>(% v/v) | Transmittance<br>(%) before<br>stability test* | Transmittance<br>(%) after<br>stability test* | Note                                        |
|-----------------------|------------------------|--------------------------|--------------------|------------------------------|------------------------------|-----------------------------|------------------------------------------------|-----------------------------------------------|---------------------------------------------|
|                       |                        | Oleic<br>acid<br>(% v/v) | EtOH<br>(%<br>v/v) | Polysorbate<br>20<br>(% w/v) | Polysorbate<br>80<br>(% w/v) |                             |                                                |                                               |                                             |
| FA3-3-Q               | Que                    | 1                        | 1                  | 0                            | 10                           | 88                          | 97.709 ± 0.010                                 | 81.212 ± 0.001                                | Turbid                                      |
| FA3-4-Q               | Que                    | 1                        | 3                  | 0                            | 10                           | 86                          | 97.297 ± 0.009                                 | 97.046 ± 0.002                                | Aggregated<br>(cycle 1, freeze-<br>thawing) |
| FA3-5-Q               | Que                    | 1                        | 3                  | 0                            | 10                           | 86                          | 98.888 ± 0.006                                 | 98.983 ± 0.002                                | Aggregated<br>(cycle 1, freeze-<br>thawing) |
| <b>**FA3-6-<br/>Q</b> | <b>Que</b>             | <b>1</b>                 | <b>3</b>           | <b>0</b>                     | <b>10</b>                    | <b>86</b>                   | <b>99.153 ± 0.012</b>                          | <b>99.184 ± 0.003</b>                         | <b>Translucent,<br/>without aggregation</b> |
| FA3-3-R               | RA                     | 1                        | 6                  | 0                            | 10                           | 83                          | 98.816 ± 0.005                                 | 76.474 ± 0.003                                | Turbid                                      |
| FA3-4-R               | RA                     | 1                        | 1                  | 10                           | 0                            | 88                          | 99.043 ± 0.020                                 | 85.090 ± 0.003                                | Aggregated<br>(cycle 1, freeze-<br>thawing) |
| FA3-5-R               | RA                     | 1                        | 3                  | 10                           | 0                            | 86                          | 98.777 ± 0.008                                 | 97.779 ± 0.005                                | Aggregated<br>(cycle 1, freeze-<br>thawing) |
| <b>**FA3-6-<br/>R</b> | <b>RA</b>              | <b>1</b>                 | <b>6</b>           | <b>10</b>                    | <b>0</b>                     | <b>83</b>                   | <b>99.999 ± 0.011</b>                          | <b>98.096 ± 0.008</b>                         | <b>Translucent,<br/>without aggregation</b> |

\*Stability tests were subsequently done from centrifugation test (25 °C, 3500 rpm, 30 min), six cycles of heating-cooling test, to three cycles of freeze-thawing test. **\*\*FA3-6-Q** and **FA3-6-R** showed desired physicochemical stability after stability tests. Ultrapure water was used as aqueous phase.
